# Supplementary material
Source: publisher site journal article supplement (https://www.dovepress.com/article/525232)
Supplement: Supplementary file 1 [file Supplementary%20materies_1.docx]

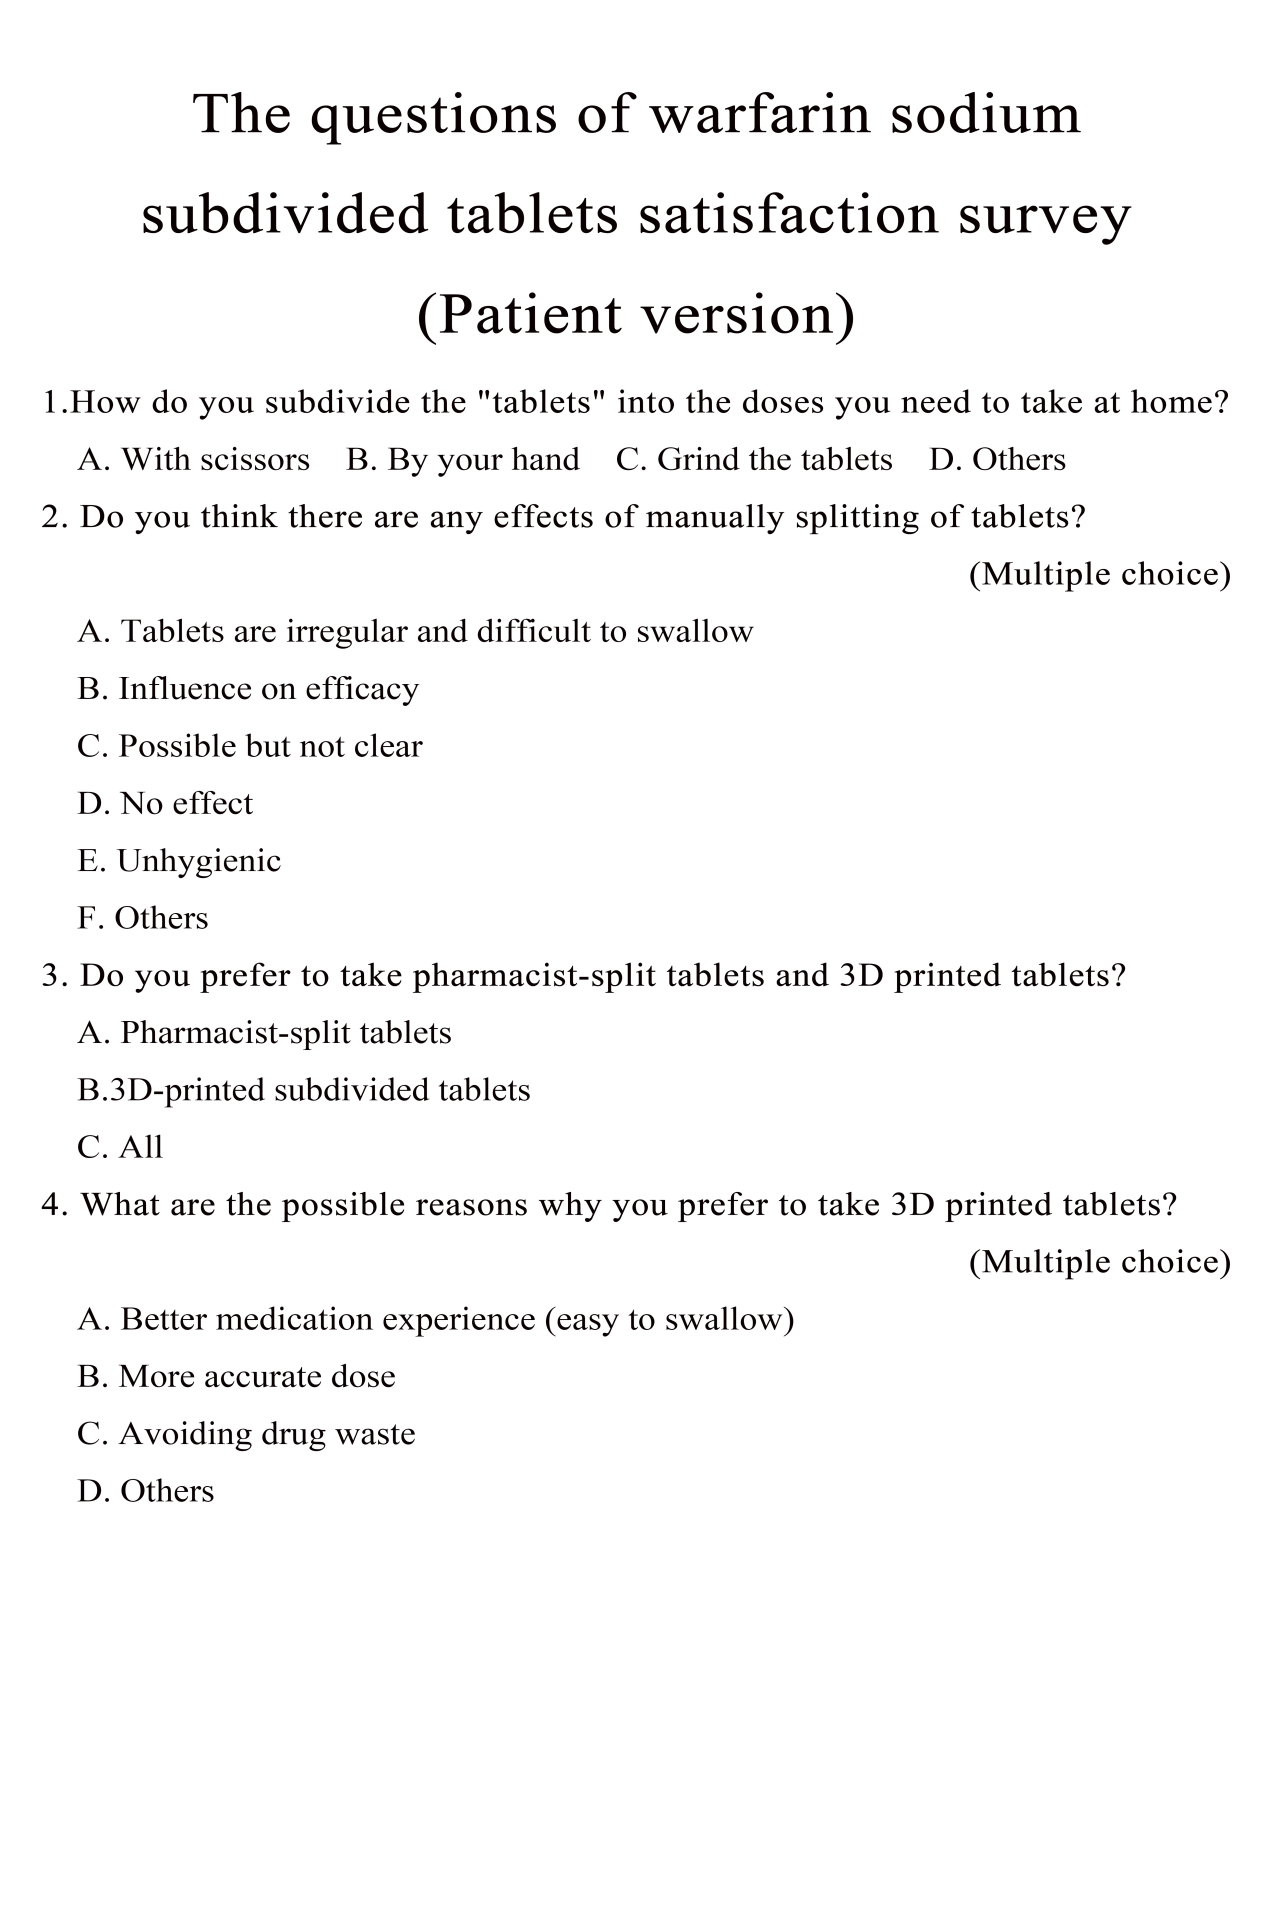


**Supplementary Figure 1A** Contents of the patient satisfaction questionnaire.


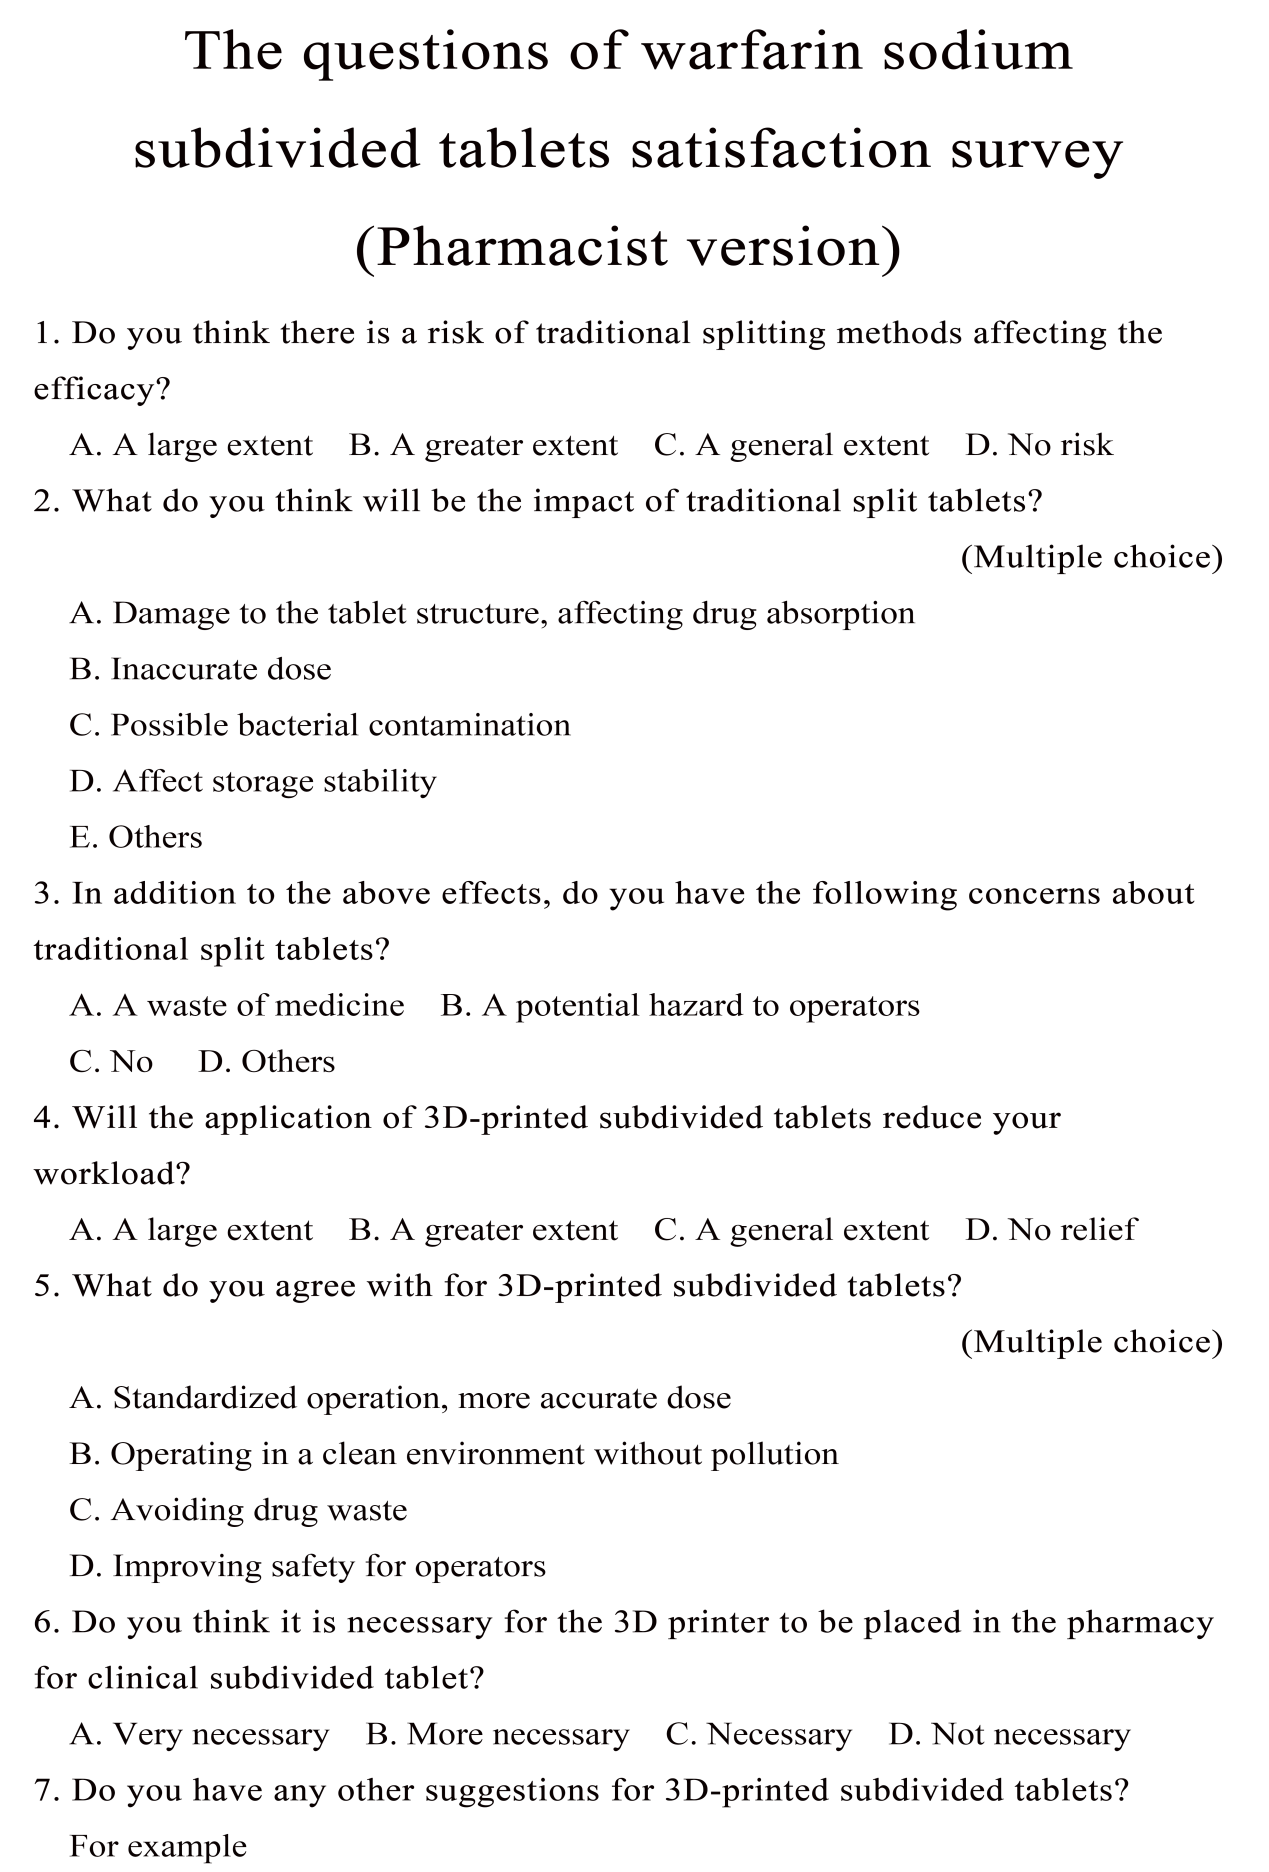


**Supplementary Figure 1B** Contents of pharmacist satisfaction questionnaire.


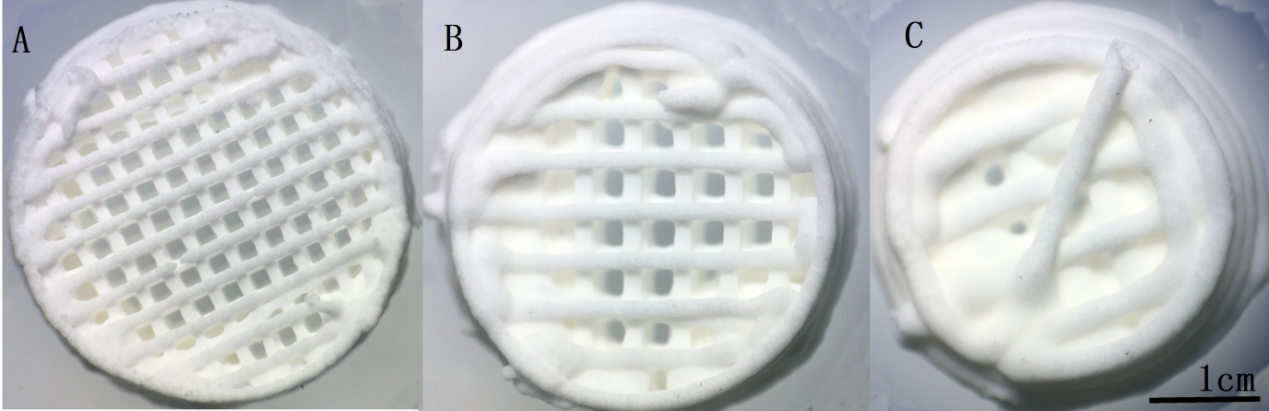


**Supplementary Figure 2** Appearance of 3D printed tablets prepared with different nozzle diameter. A. 0.26mm; B. 0.41mm; C. 0.60mm.


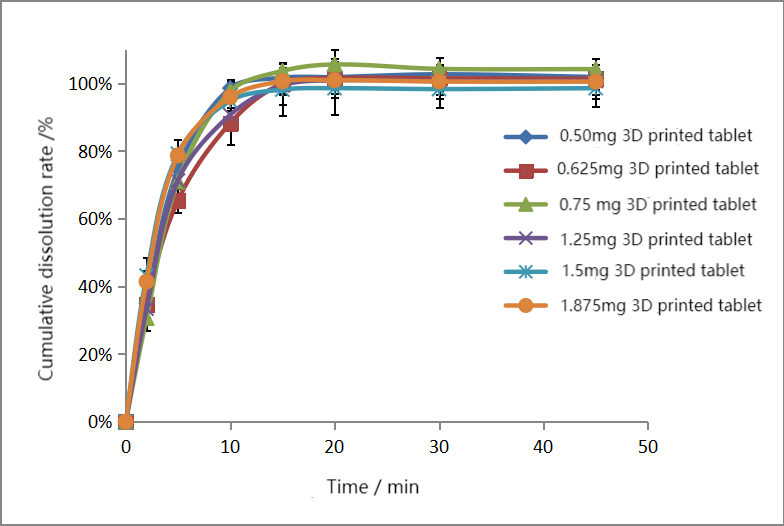


**Supplementary Figure** 3 Dissolution curve of warfarin sodium 3D printed tablets (n=6),x±SD.

**Supplementary Table 1** Process parameters of 3D printing paste

| **Preparation process** | **1** | **2** | **3** | **4** |
| --- | --- | --- | --- | --- |
| **Grinding methods** | Mortar | Grinder | - | - |
| **Mesh number of sieve** | 70 mesh | 120 mesh | 250 mesh | 700 mesh |
| **Mixing times** | 2 minutes | 5 minutes | 10 minutes | - |

**Abbreviations:** -, none.

**Supplementary Table 2** Single factor test of piston extrusion-based 3D printer parameters

| **Parameters** | **1** | **2** | **3** | **4** |
| --- | --- | --- | --- | --- |
| **Nozzle diameter（mm）** | 0.26 | 0.41 | 0.60 | - |
| **Layer height (mm)** | ＜nozzle diameter ×0.8 | Nozzle diameter ×0.8 | ＞nozzle diameter ×0.8 | - |
| **printing speed (mm/s)** | 5 | 10 | 15 | 20 |

**Abbreviations:** -, none.

**Supplementary Table 3** The hardness of WFS 3D-printed subdivided tablets (n=5, ‾x±SD)

| Specifications | 0.50 mg | 0.625 mg | 0.75 mg | 1.25 mg | 1.50 mg | 1.875 mg |
| --- | --- | --- | --- | --- | --- | --- |
| Harness/N | 8.04±2.60 | 10.70±2.43 | 10.13±4.23 | 15.98±3.67 | 14.23±4.63 | 19.95±6.13 |
| Ch. P, requirements | - | | | | | |

**Abbreviations:** -, none.

**Supplementary Table 4** Comparison of related substances in two subdivision methods of WFS (n=3, ‾x±SD)

| Group | Specifications | Related substances /% | Ch. P, requirements/% |
| --- | --- | --- | --- |
| 3D-printed subdivided tablets | 0.50 mg | 0.41±0.12 | 1.0 |
| 0.625 mg | 0.37±0.02 |
| 0.75 mg | 0.38±0.04 |
| 1.25 mg | 0.37±0.02 |
| 1.50 mg | 0.26±0.06 |
| 1.875 mg | 0.22±0.02 |
| The pharmacist-split tablets | 0.50 mg | 0.55±0.04 |
| 0.625 mg | 0.53±0.14 |
| 0.75 mg | 0.47±0.03 |
| 1.25 mg | 0.45±0.04 |
| 1.50 mg | 0.46±0.02 |
| 1.875 mg | 0.42±0.08 |
